# Supplementary material
Source: PubMed Central journal article supplement (PMC1326161)
Supplement: pnas_0507109103_2.pdf [file pnas_0507109103_2.pdf]

X module

```

CipA  NKPVI-EGYKVSYGYILPDFSFDATVAPLVKAGFKVVEIVGTELYAVTDANGYFEITGVPANASGYTLKISRATYLDRVIANVVVTGDTSVSTSQAPIMM
ScaA  NIGIVSEGTTVSGYINPDFTTSTTAPIVKAGFTVEIVGTTKSAVTDSNGYFEIKDVAAGT--YTLKITKANYLTREIANVSVTADKELSTSASPILM
Igd2  NNDST-DKTTVSGYISVDFDYPPESESKIKSGFNVKVAGTELSTKTDEKGYFEISGIPGDMREFTLEISKRNYLKRNVT-VNGTGKLVSTEDNPLIL
  
```

Dockerin

```

CipA  WVGDIVK---DNSINLLDVAEVIRCFNATKGSANYVEELDINRNGAINMQDIMIVHKHFGATSSDYDAQ
ScaA  WAGDMAIGGTQDGAINLEDILEICKAFNTSSTDAKYQVGLDLNRDGAISLEDVMIVAKHFNKVSSDY---
Igd2  WAGDVERKGVQDNAINMVDMEISKVFGTRAGDEEYVAELDLNMDGAINLFDIAIVIRHFNALPSRY---
      * *          * * * *          * * * * * *
  
```
