# Supplementary material
Source: PubMed Central journal article supplement (PMC1326161)

a

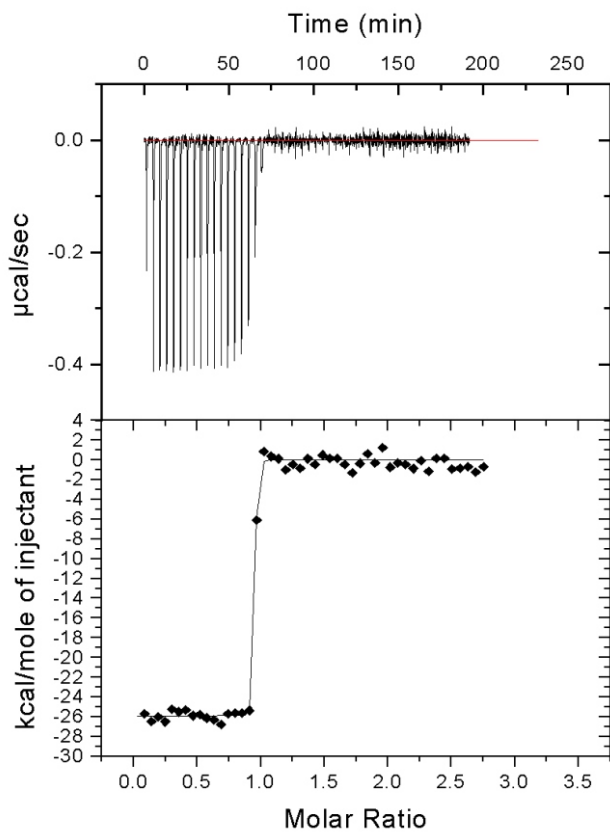

b

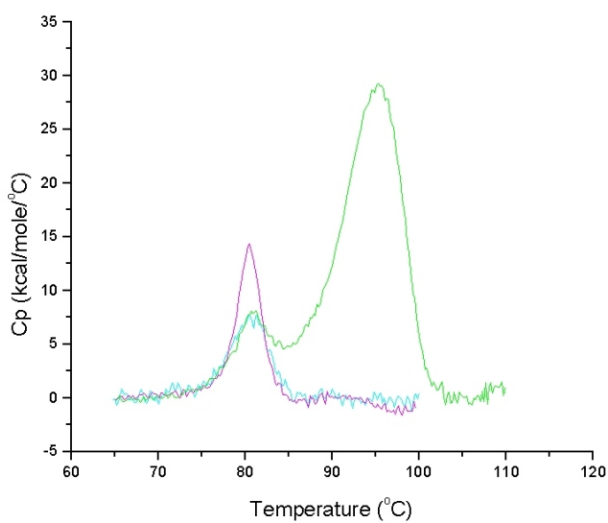

Supplement: pnas_0507109103_1.pdf [file pnas_0507109103_1.pdf]
